# Supplementary material for: Construction of nano-lamellar expressways and multidimensional defects to realize the decoupling of carrier–phonon transport in BiSbSe1.25Te1.75
Source: Royal Society of Chemistry journal article supplement (doi:10.1039/d4qi02874k), 2024-12-11
Supplement: d4qi02874k1.pdf [file d4qi02874k1.pdf]

## Supporting Information

### Construction of Nano-Lamellar Expressways and Multidimensional Defects Realizes the Decoupling of Carrier-Phonon Transport in BiSbSe<sub>1.25</sub>Te<sub>1.75</sub>

Zhen Tian<sup>a</sup>, Quanwei Jiang<sup>a</sup>, Jianbo Li<sup>a</sup>, Huijun Kang<sup>a,b,\*</sup>, Zongning Chen<sup>a,b</sup>, Enyu Guo<sup>a,b</sup>, Tongmin Wang<sup>a,b,\*</sup>

<sup>a</sup> Key Laboratory of Solidification Control and Digital Preparation Technology (Liaoning Province), School of Materials Science and Engineering, Dalian University of Technology, Dalian 116024, China

<sup>b</sup> Ningbo Institute of Dalian University of Technology, Ningbo 315000, China

\*Corresponding authors. E-mail: kanghuijun@dlut.edu.cn (H. Kang);  
tmwang@dlut.edu.cn (T. Wang)

**Keywords:** Identical chemical composition, n-type BiSbSe<sub>1.25</sub>Te<sub>1.75</sub>, Hot deformation, Synergistic optimization, Decouple

## **Experimental details**

**Material synthesis:** High-purity elemental chunks of Bi, Sb, Se and Te with >99.999% were weighed based on the stoichiometric ratio of  $\text{BiSbSe}_{1.25}\text{Te}_{1.75}$  and sealed in a quartz tube of  $10^{-3}$  Pa for the solid-phase reaction. The tube was placed into box furnace, then slowly heated up to 1273 K and soaked at 1273 K for 6 h. The obtained ingot was ground into powders using an agate mortar, and then hot pressed at 1273 K 80Mpa and for 30 minutes in a 15 mm-diameter graphite die, producing the initial bulk samples named as HD0. Subsequently, a hot deformation process was performed by repressing the HD0 samples in a larger graphite die with an inner diameter of 20 mm at 823 K for 30 min using the same stress. Finally, disk-shaped samples of 20 mm called HD $x$  were obtained and  $x$  stand for hot deformation times.

**Structural Characterization:** The phase structure of the samples was examined over the  $2\theta$  range of  $10\text{-}80^\circ$  using an X-ray diffractometer (XRD, Empyrean, PANalytical, Netherlands) and the texture evolution were carried out by the pole figure measurement using the Schulz back-reflection method (XRD, D8 Advance, Bruker, Germany) The fractographs were determined by scanning electron microscopy (SEM, IT800-SHL, JEOL, Japan). The atomic-scale microstructures were characterized by scanning transmission electron microscopy (STEM, FEI Titan G2 60-300, FEI, USA). The specimen for STEM analysis was prepared by using a focused ion beam (FIB, Helios G4 UX, FEI, USA).

**Thermoelectric transport properties:** The electrical conductivity and Seebeck

coefficient were measured simultaneously on a commercial equipment (LSR-3, Linseis, Germany) under a high-purity helium atmosphere at a temperature range of 300-525 K. And Seebeck coefficients for BSTS-I, BSTS-PB5 and BSTS-PB220 samples were measured by using the Portable Thermoelectric Meter-3 (PTM-3, Joule Yacht) at 300 K, respectively. To ensure the accuracy, each sample was measured ten times at various locations. The thermal diffusivity ( $D$ ) and specific heat capacity ( $C_p$ ) of  $\text{BiSbTe}_{1.5}\text{Se}_{1.5}$  samples were determined by laser flash apparatus ((LFA-457, Netzsch, Germany) and differential scanning calorimeter (DSC 404 F3, Netzsch, Germany) in argon flow, respectively. The carrier concentration and carrier mobility were measured under a reversible magnetic field (0.9 T) by the Van der Pauw method by using a Hall measurement system (Lake Shore 8400 Series, Model 8404, USA) at 323 K. The volume density ( $\rho$ ) was measured using the Archimedes method and the thermal conductivity ( $\kappa$ ) was calculated according to the equation  $\kappa = DC_p\rho$ .

### **The preferred orientations**

The preferred orientations  $F$  of the  $(00l)$  planes for HDx bulk  $\text{BiSbSe}_{1.25}\text{Te}_{1.75}$  samples are evaluated based on the Lotgering factor[1-3] via analysis of the XRD pattern according to the following equations (1) and (2):

$$F = (P - P_0) / (1 - P_0) \quad (\text{S1})$$

$$P = \sum I(00l) / \sum I(hkl) \quad (\text{S2})$$

### **The single parabolic band (SPB) model**

The single parabolic band (SPB) model was adopted to calculate the relationship between Seebeck coefficient and carrier concentrations at 323 K.[4] The Seebeck

coefficient and carrier concentration of a degenerate semiconductor can be expressed as followed equations:

$$S = \frac{k_B}{e} \left( \frac{(2 + \lambda)F_{1+\lambda}(\eta)}{(1 + \lambda)F_\lambda(\eta)} - \eta \right) \quad (S3)$$

$$n_H = 4\pi \left( \frac{2m^* kT}{h^2} \right)^{\frac{3}{2}} F_{\frac{1}{2}}(\eta) \quad (S4)$$

$$n_H = 4\pi \left( \frac{2m^* kT}{h^2} \right)^{\frac{3}{2}} F_{\frac{1}{2}}(\eta) \quad (S5)$$

where  $k_B$ ,  $e$ ,  $\eta$ ,  $h$ , and  $\lambda$  is the Boltzmann constant, electron charge, chemical potential, Planck constant and phonon scattering factor ( $\lambda = 0$ ).  $F_j(\eta)$  is the Fermi integral, with  $x$  being the reduced carrier energy. The reduced Fermi energy  $\eta$  is determined based on the fitting of the Seebeck coefficients.

The band effective masses  $m^*$  in this work at 323 K is obtained by fitting experimental data into Equations S1, S2 and S3. The Lorenz number  $L$  can be evaluated by the following Equation S6,

$$L = \frac{k^2 3F_0(\eta)F_2(\eta) - 2F_1(\eta)^2}{e^2 F_0(\eta)^2} \quad (S6)$$

### Weighted mobility

The weighted mobility  $\mu_w$  at 323 K was calculated using the measured data of  $S$  and the  $\sigma$  according to the following formula[5]:

$$\mu_w = \frac{3h^3 \sigma}{8\pi e (2m_e k_B T)^{3/2}} \left[ \frac{\exp \left[ \frac{|S|}{k_B/e} - 2 \right]}{1 + \exp \left[ -5 \left( \frac{|S|}{k_B/e} - 1 \right) \right]} + \frac{\frac{3|S|}{\pi^2 k_B/e}}{1 + \exp \left[ 5 \left( \frac{|S|}{k_B/e} - 1 \right) \right]} \right] \quad (S7)$$

### The dimensionless quality factor $B$

The dimensionless quality factor  $B$  is calculated using the following relationship[6]:

$$B = 9 \frac{\mu_w}{\kappa_L} \left( \frac{T}{300} \right)^{5/2} \quad (\text{S8})$$

**Table S1.** Comparisons of *ZT* at low temperature for HD3 and other state-of-the-art systems.

| Material                                                                                                                   | Operating temperature (K) | Type | <i>ZT</i> |
|----------------------------------------------------------------------------------------------------------------------------|---------------------------|------|-----------|
| Mg <sub>3.2</sub> Bi <sub>1.298</sub> Sb <sub>0.7</sub> Te <sub>0.002</sub> <sup>[7]</sup>                                 | 350                       | n    | 0.9       |
| Mg <sub>2.475</sub> Zn <sub>0.5</sub> Li <sub>0.025</sub> Sb <sub>2</sub> <sup>[8]</sup>                                   | 350                       | p    | 0.1       |
| Bi <sub>2</sub> Te <sub>3</sub> <sup>[9]</sup>                                                                             | 300                       | n    | 0.65      |
| (Bi <sub>0.5</sub> Sb <sub>1.5</sub> Te <sub>3</sub> ) <sub>0.97</sub> (MgB <sub>2</sub> ) <sub>0.03</sub> <sup>[10]</sup> | 300                       | p    | 1.2       |
| AgPb <sub>10</sub> SbTe <sub>12</sub> <sup>[11]</sup>                                                                      | 300                       | n    | 0.37      |
| Ag <sub>0.83</sub> Sb <sub>1.06</sub> Te <sub>2</sub> <sup>[12]</sup>                                                      | 300                       | p    | 0.32      |
| HD3                                                                                                                        | 323                       | n    | 0.39      |

## References

- [1] F.K. Lotgering, Topotactical reactions with ferrimagnetic oxides having hexagonal crystal structures—I, *Journal of Inorganic and Nuclear Chemistry* **1959**, *9*, 113-123.
- [2] T. Kobayashi, R. Ogawa, K.i. Miyazawa, M. Kuwabara, Fabrication of  $\beta$ -BaB<sub>2</sub>O<sub>4</sub> thin films with (001) preferred orientation through the chemical solution deposition technique, *Journal of Materials Research* **2002**, *17*, 844 - 851.
- [3] Z. Tian, J. Wang, X. Yaer, H. Kang, X. Wang, H. Liu, D. Yang, T. Wang, Pencil painting like preparation for flexible thermoelectric material of high-performance p-type Na<sub>1.4</sub>Co<sub>2</sub>O<sub>4</sub> and novel n-type Na<sub>x</sub>Co<sub>2</sub>O<sub>4</sub>, *Journal of Materiomics* **2021**, *7*, 1153-1160.
- [4] E.S. Toberer, A. Zevalkink, N. Crisosto, G.J. Snyder, The Zintl Compound Ca<sub>5</sub>Al<sub>2</sub>Sb<sub>6</sub> for Low-Cost Thermoelectric Power Generation, *Advanced Functional Materials* **2010**, *20*, 4375-4380.
- [5] G.J. Snyder, A.H. Snyder, M. Wood, R. Gurunathan, B.H. Snyder, C. Niu, Weighted Mobility, *Advanced Materials* **2020**, *32*.
- [6] Y. Xiao, D. Wang, Y. Zhang, C. Chen, S. Zhang, K. Wang, G. Wang, S.J. Pennycook, G.J. Snyder, H. Wu, L. Zhao, Band Sharpening and Band Alignment Enable High Quality Factor to Enhance Thermoelectric Performance in n-Type PbS, *Journal of the American Chemical Society* **2020**, *142*, 4051-4060.
- [7] J. Mao, H.T. Zhu, Z.W. Lui, G.A. Gamage, G. Chen, Z.F. Ren, High thermoelectric cooling performance of n-type Mg<sub>3</sub>Bi<sub>2</sub>-based materials. *Science*, 2019, **365**, 495-498.
- [8] C. Chen, X.F. Li, S. Li, X.Y. Wang, Z.W. Zhang, J.H. Sui, F. Cao, X.J. Liu, Q. Zhang, Enhanced thermoelectric performance of p-type Mg<sub>3</sub>Sb<sub>2</sub> by lithium doping and its tunability in an anionic framework. *J. Mater. Sci.*, 2018, **53**, 16001-16009.
- [9] X.B. Zhao, X.H. Ji, Y.H. Zhang, T.J. Zhu, J.P. Tu, X.B. Zhang, Bismuth telluride nanotubes and the effects on the thermoelectric properties of nanotube-containing nanocomposites. *Appl. Phys. Lett.*, 2005, **86**, 06211.
- [10] C.H. Zhang, Q.W. Lai, W. Wang, X.Y. Zhou, K.L. Lan, L.P. Hu, B.W. Cai, M. Wuttig, J.Q. He, F.S. Liu, Y. Yu, Gibbs adsorption and zener pinning enable mechanically robust high-performance

Bi<sub>2</sub>Te<sub>3</sub>-based thermoelectric devices. *Adv. Sci.*, 2023, **10**, 2302688

[11] K.F. Hsu, S. Loo, F. Guo, W. Chen, J.S. Dyck, C. Uher, T. Hogan, E.K. Polychroniadis, M.G. Kanatzidis, Cubic AgPb<sub>m</sub>SbTe<sub>2+m</sub>: bulk thermoelectric materials with high figure of merit. *Science*, 2004, **303**, 818-821.

[12] H. Wang, J.F. Li, M. Zou, T. Sui, Synthesis and transport properties of AgSbTe<sub>2</sub> as a promising thermoelectric compound. *Appl. Phys. Lett.* 2008, **93**, 202106.
